# Supplementary material
Source: PubMed Central journal article supplement (PMC5278697)
Supplement: AAC.02130-16_zac002175865s1.pdf [file AAC.02130-16_zac002175865s1.pdf]

**Table S1. Primers used in this study.**

| Primer Name                                                                  | Primer Utility                                       | Sequence(s)                                                                                                                                                                                     |
|------------------------------------------------------------------------------|------------------------------------------------------|-------------------------------------------------------------------------------------------------------------------------------------------------------------------------------------------------|
| Kanseq_Rev                                                                   | Transposon insertion locus determination             | 5'-GCATCGCCTTCTATCGCCTTC-3'                                                                                                                                                                     |
| <i>fadD2</i> _For<br><i>fadD2</i> _Rev                                       | <i>fadD2</i> disruption/deletion complementation     | 5'-TTTTAAGCTTATGCCTAACCTCACTGATCT-3'<br>5'-TTTGTAGCCTACAGCTTGCCTAGCTCAC-3'                                                                                                                      |
| <i>fadD2</i> _LL<br><i>fadD2</i> _LR<br><i>fadD2</i> _RL<br><i>fadD2</i> _RR | <i>fadD2</i> deletion                                | 5'-TTTTTTTTTACAAAGTGTTGGCGTTCTGGTTGAAGTC-3'<br>5'-TTTTTTTTTCACTTCGTGGGGTCGCAAATTACCATGAG-3'<br>5'-TTTTTTTTTCCATAGATTGGTCACCGCATCGGTGCCAAAG-3'<br>5'-TTTTTTTTTCCATCTTTTGGCGCGTTCGGAACCGACAATC-3' |
| <i>fadD2</i> _DelCheck_5'<br><i>fadD2</i> _DelCheck_3'                       | <i>fadD2</i> deletion confirmation                   | 5'-GGCCAACCGCGTCATCCATC-3'<br>5'-GGTGGGTGCTGCCATATCTG-3'                                                                                                                                        |
| <i>fadD2</i> _Pur_For<br><i>fadD2</i> _Pur_Rev                               | <i>fadD2</i> overexpression and protein purification | 5'-AAAAGCTAGCATGCCTAACCTCACTGATCT-3'<br>5'-AAAAAAGCTTCTACAGCTTGCCTAGCTCAC-3'                                                                                                                    |

**Table S2. Conservation of the FadD2 amino acid sequence among members of the *M. tuberculosis* complex and other mycobacteria.**

| <b>Species/Strain</b>        | <b>% Identity*</b> | <b>Positives</b> | <b>Gaps</b> | <b>Notable Differences in Sequence*</b> |
|------------------------------|--------------------|------------------|-------------|-----------------------------------------|
| <i>M. bovis</i> BCG Pasteur  | 100%               | 560/560          | 0/560       | —                                       |
| <i>M. bovis</i>              | 100%               | 560/560          | 0/560       | —                                       |
| <i>M. tuberculosis</i> H37Rv | 99%                | 559/560          | 0/560       | E112D                                   |
| <i>M. africanum</i>          | 99%                | 559/560          | 0/560       | E112D                                   |
| <i>M. avium</i>              | 84%                | 512/560          | 1/560       | —                                       |
| <i>M. marinum</i>            | 84%                | 510/560          | 6/560       | —                                       |
| <i>M. leprae</i>             | 82%                | 505/560          | 4/560       | —                                       |
| <i>M. smegmatis</i>          | 77%                | 488/560          | 4/560       | —                                       |

\*Relative to the *M. bovis* BCG Pasteur FadD2 amino acid sequence.

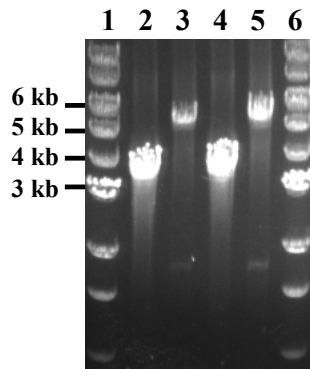

**Figure S1. Confirmation of *fadD2* deletion in *M. tuberculosis* H37Rv and in *M. bovis* BCG by PCR.** The *fadD2* locus was amplified using wild-type *M. tuberculosis* H37Rv (lane 2), *M. tuberculosis* H37Rv  $\Delta$ *fadD2* (lane 3), *M. bovis* BCG (lane 4), and *M. bovis* BCG  $\Delta$ *fadD2* (lane 5) genomic DNA as templates and using primers (*fadD2*\_DelCheck\_5' and *fadD2*\_DelCheck\_3' in Table S1) specific to the chromosomal regions adjacent to the flanking regions included in the deletion construct to direct allelic exchange. Lanes 1 and 6 contain NEB 1 Kb ladder. The wild type *fadD2* product is 3.6-kb and  $\Delta$ *fadD2* product is 5.5-kb due to allelic replacement with the *hyg-sacB* cassette.
